# Supplementary material
Source: Springer Nature journal article supplement (https://www.springermedizin.de/resource/supplementary/12885_2014_4731_MOESM8_ESM.pdf/9467088)

A.

**Normal Colon**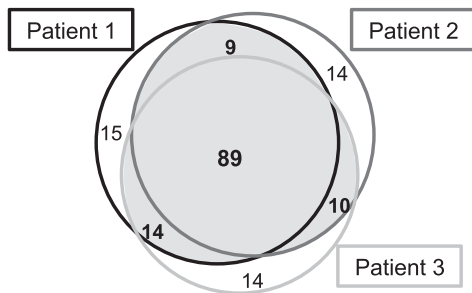

B.

**Primary Colon Tumor**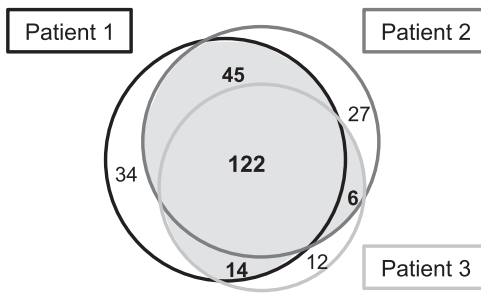

C.

**Metastasis to Liver**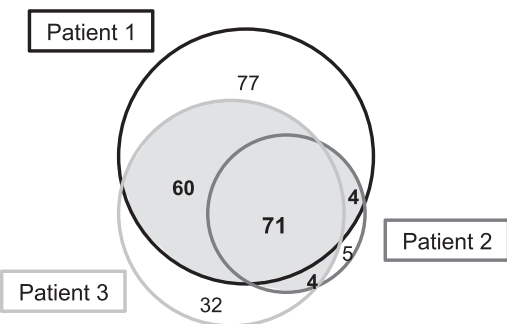

D.

**Normal Liver**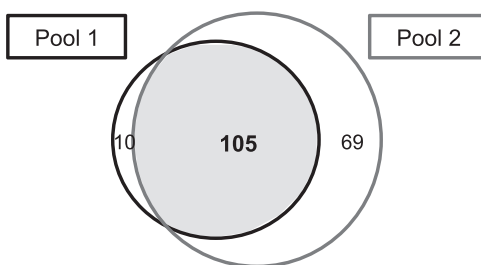

E.

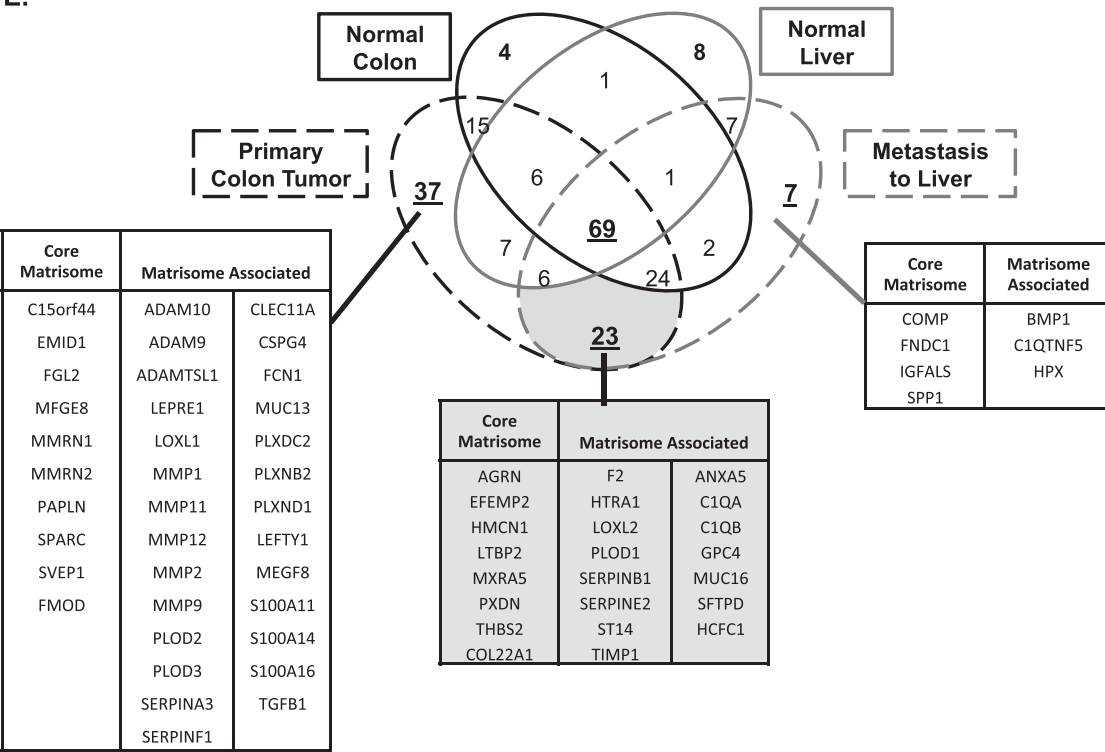

Supplement: MOESM8 [file 9467088]
